# Supplementary material for: Targeting NRF2 Sensitizes Esophageal Adenocarcinoma Cells to Cisplatin through Induction of Ferroptosis and Apoptosis
Source: MDPI journal article supplement (doi:10.3390/antiox11101859), 2022-09-21
Supplement: s1 [file s1]

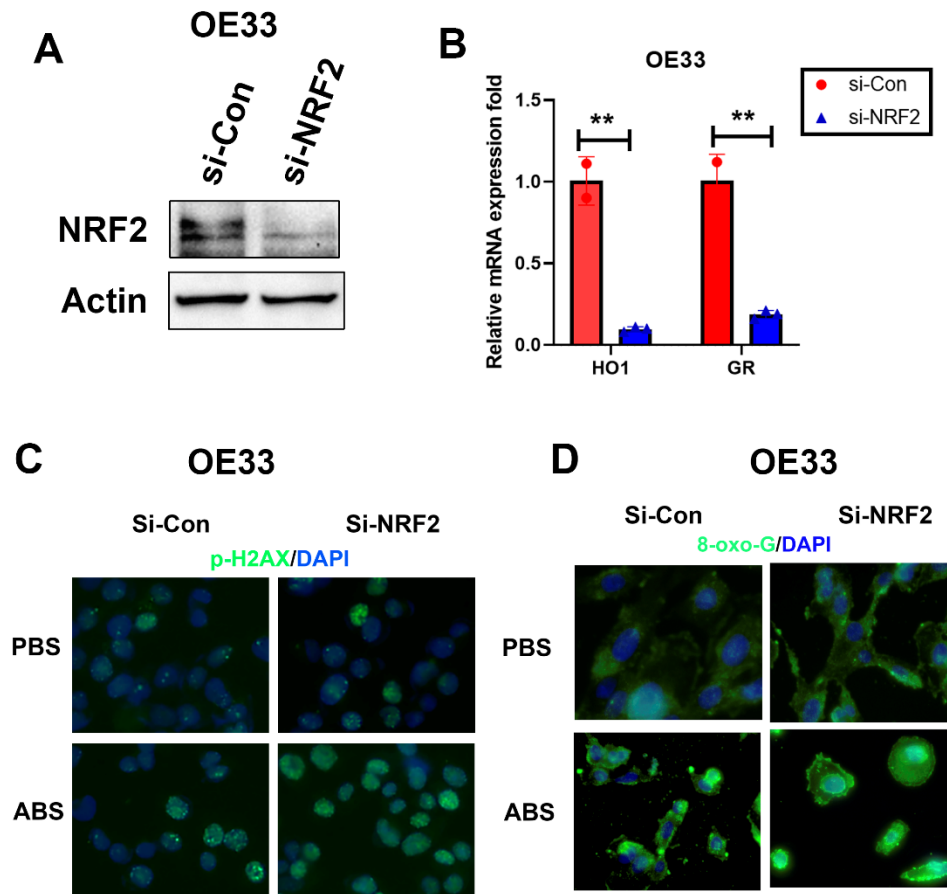

**Supplementary Figure S1. Knockdown of NRF2 enhanced acidic bile salts (ABS)-induced DNA damage.** *A*, western blotting demonstrated success knockdown of NRF2 by a NRF2 siRNA in OE33 cells. *B*, qRT-PCR showed downregulation of known NRF2 target genes after knockdown of NRF2. *C*, immunofluorescence staining of p-H2AX ( $\gamma$ H2AX) for double strand break after ABS treatment. *D*, immunofluorescence staining of 8-oxoguanine (8-oxoG), an oxidative DNA damage marker.

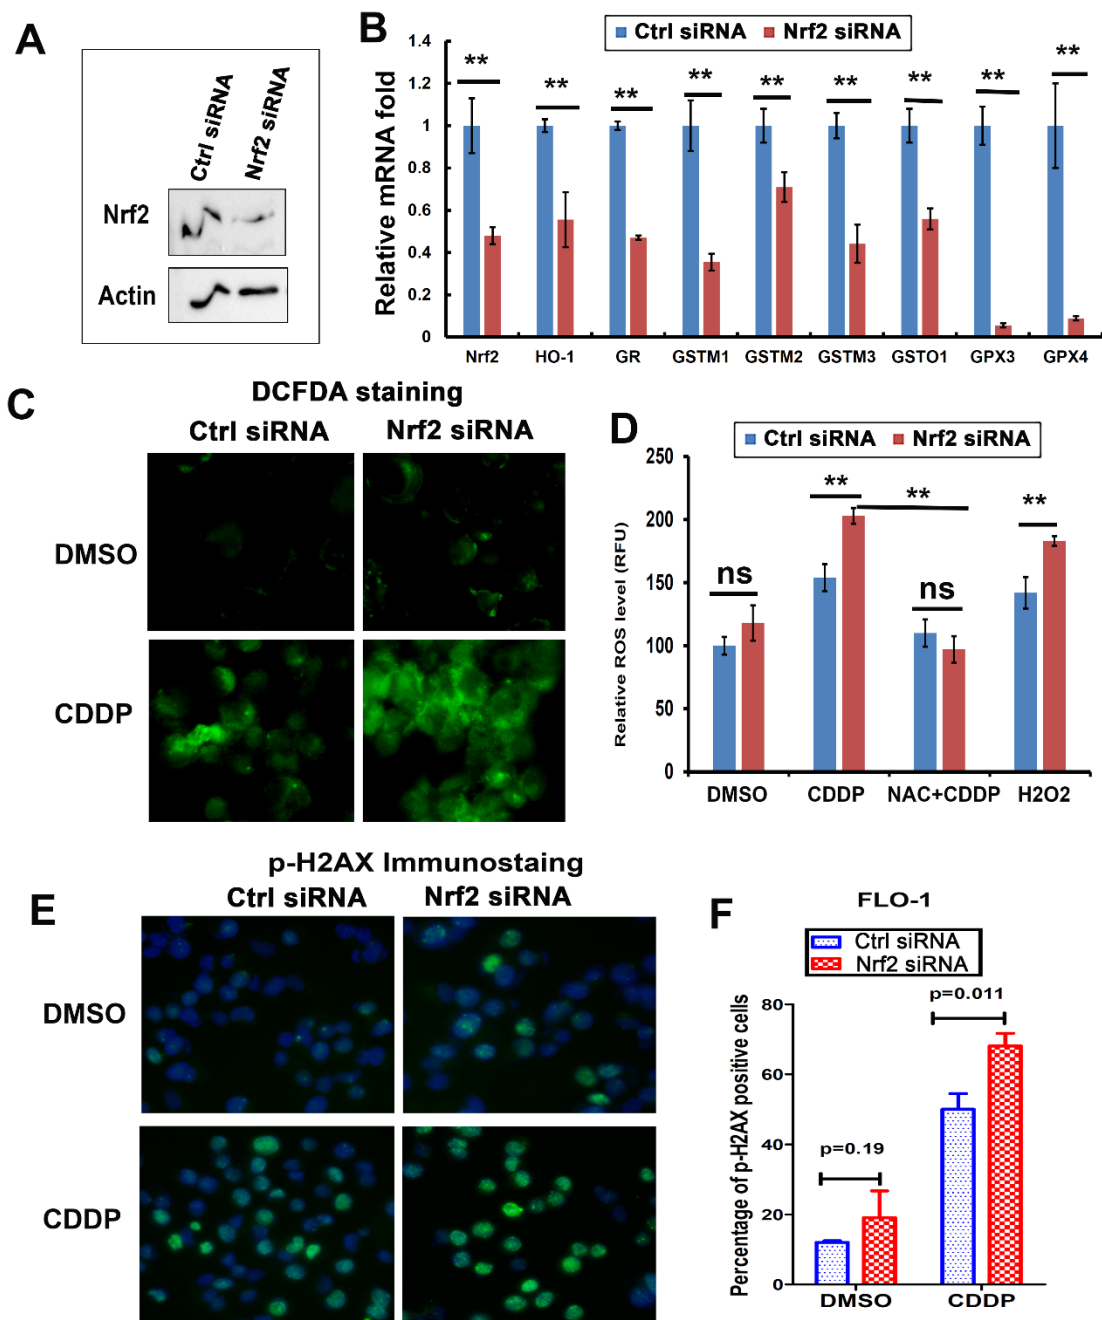

**Supplementary Figure S2. Knockdown of NRF2 enhanced CDDP-induced oxidative stress and DNA damage.** **A**, western blotting demonstrated success knockdown of NRF2 by a NRF2 siRNA in FLO1 cells. **B**, qRT-PCR showed downregulation of multiple known NRF2 target genes after knockdown of NRF2. **C**, DCFDA staining for intracellular ROS level after cisplatin (CDDP) treatment in NRF2 siRNA and control cells. **D**, Bar graph summarizes the relative intracellular ROS levels detected using DCFDA. NAC is ROS scavenger and H2O2 as positive control. **E**, immunofluorescence staining of p-H2AX ( $\gamma$ H2AX) for double strand break after CDDP treatment. **F**, Quantification of  $\gamma$ H2AX positive cells.

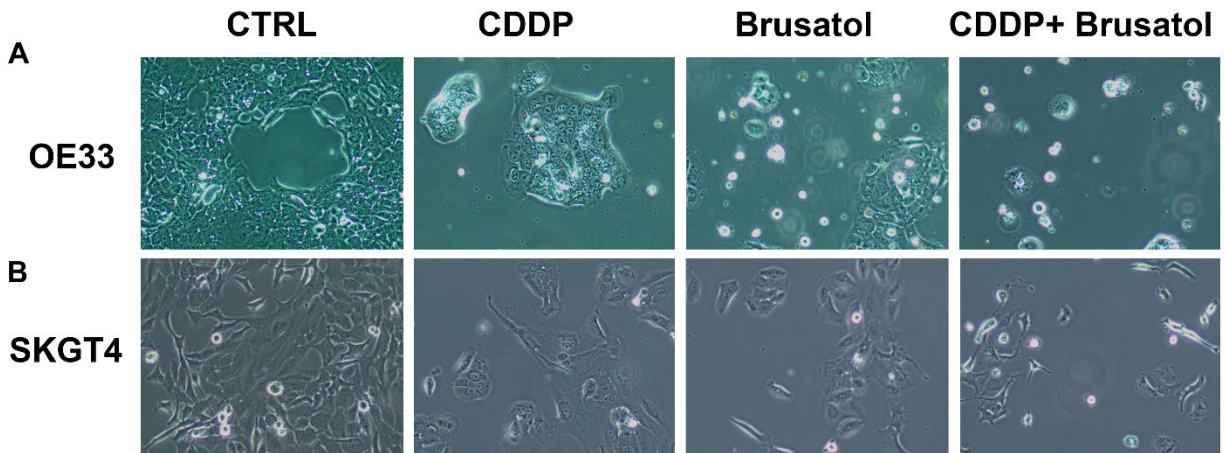

**Supplementary Figure S3. Combination treatment of Brusatol and CDDP generated more cell death than CDDP and Brusatol alone.** OE33 cells (A) and SKGT4 cells (B) were treated with Brusatol and CDDP alone or combination for 72h. Images were taken using an inverted microscope.

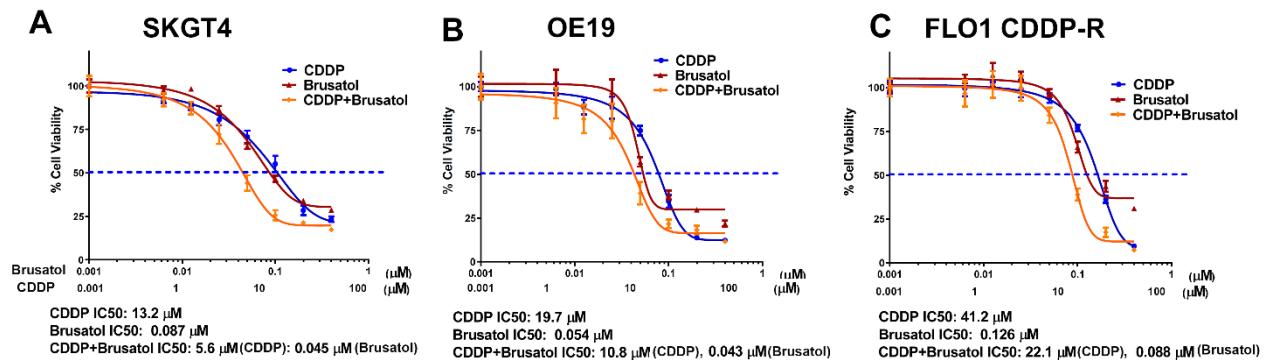

**Supplementary Figure S4. Combination treatment of Brusatol and CDDP generated significant more tumor cell death than CDDP and Brusatol alone in CDDP resistant cells.** SKGT4 (A), OE19 (B), two EAC cell lines resistant to CDDP and FLO1 CDDP-R (C, a FLO1 subline resistant to CDDP) were treated with Brusatol and CDDP alone or combination in a series deducted concentrations. Cell viability was measured 3 days after treatments using CellTiter Viability Assay. Results were analyzed using Prism software and were presented as IC50. Data show that Brusatol reduced about 50% CDDP IC50 in these CDDP resistant cells.

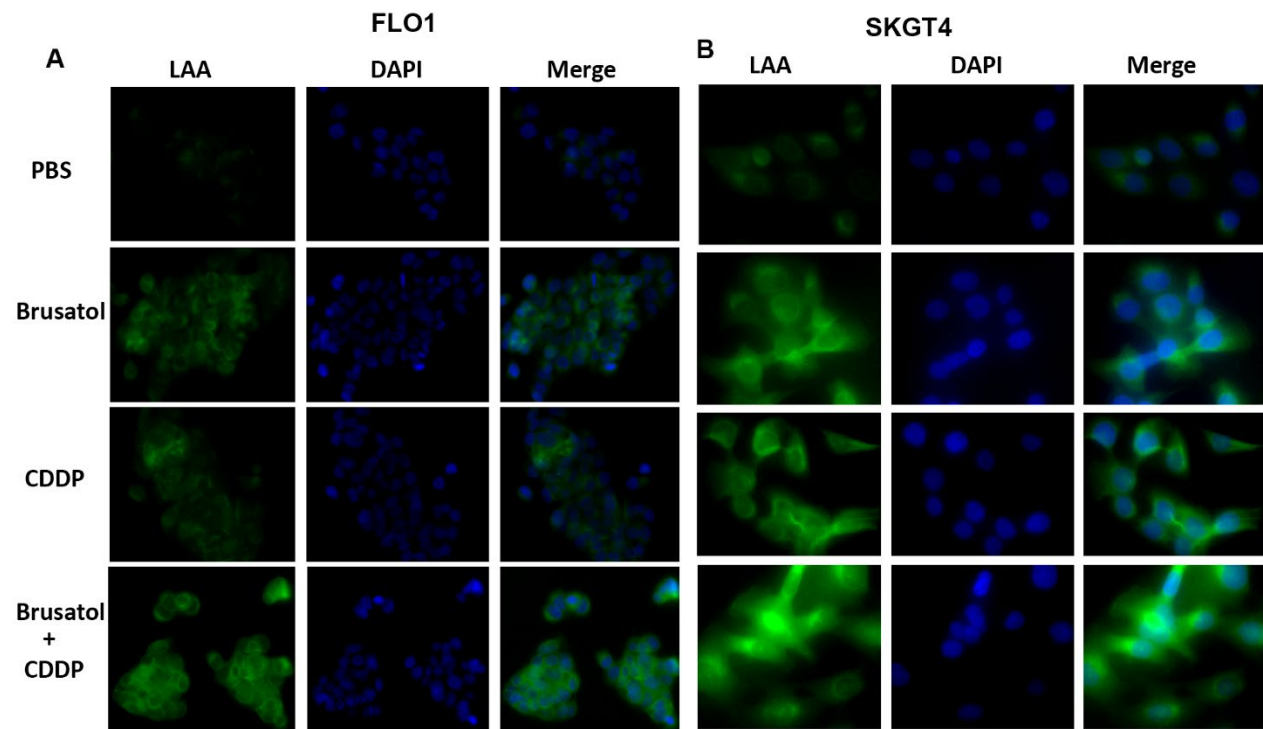

**Supplementary Figure S5. LAA lipid peroxidation assay in FLO1 and SKGT4 cells.** LAA was co-incubated with Brusatol or CDDP or both for 6h, then following manufactory's protocol described in Method section. The lipid peroxidation levels were illustrated as green signaling.

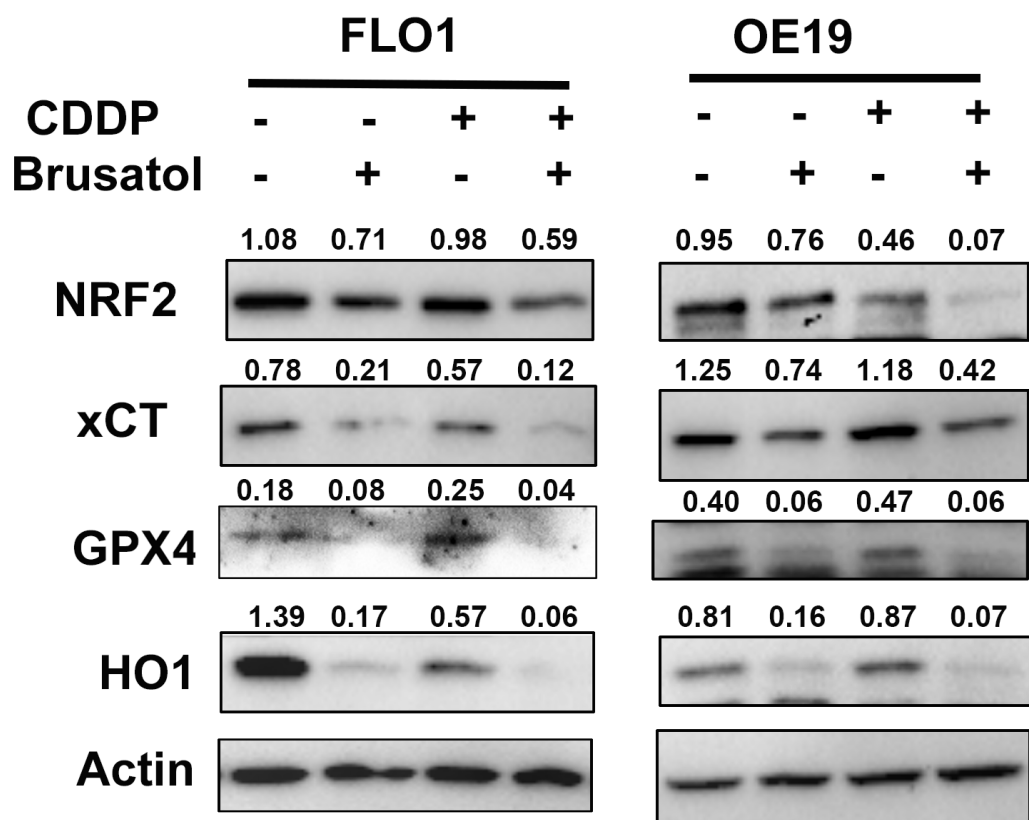

**Supplementary Figure S6. Brusatol or combination of Brusatol and CDDP induced ferroptosis in FLO1 and OE19 cells.** Western blotting assay shows reduced levels of xCT and GPX4, two ferroptosis markers, in Brusatol or combination treated cells, together with down regulation of HO1, a known NRF2 target gene. The numbers above each band indicate the relative band intensity as normalized to the intensity of the loading control, Actin.

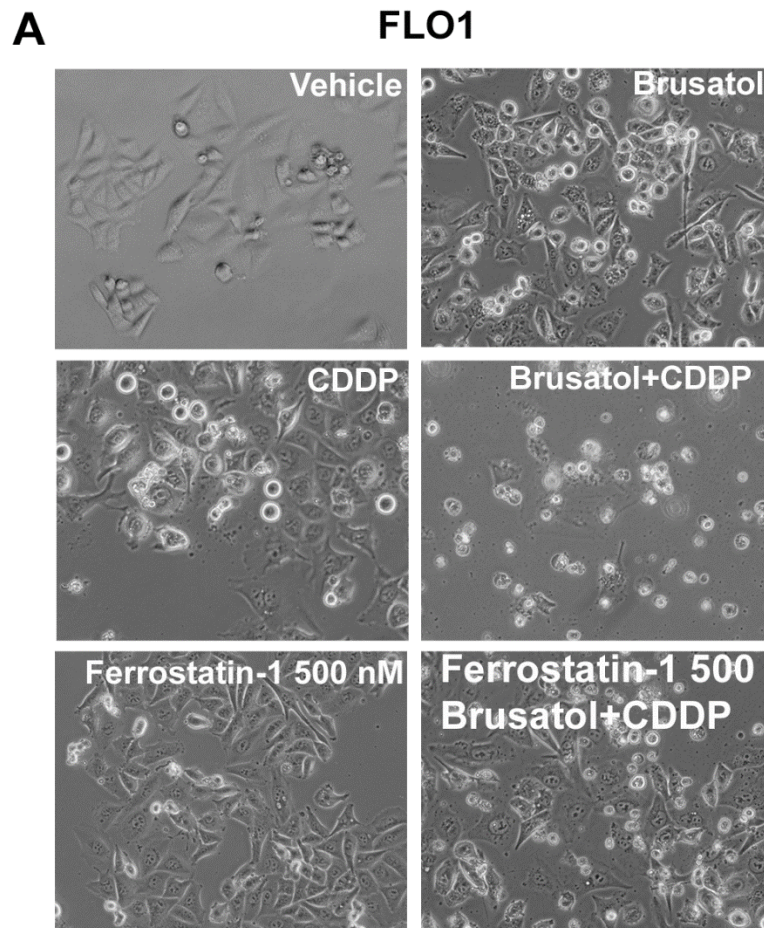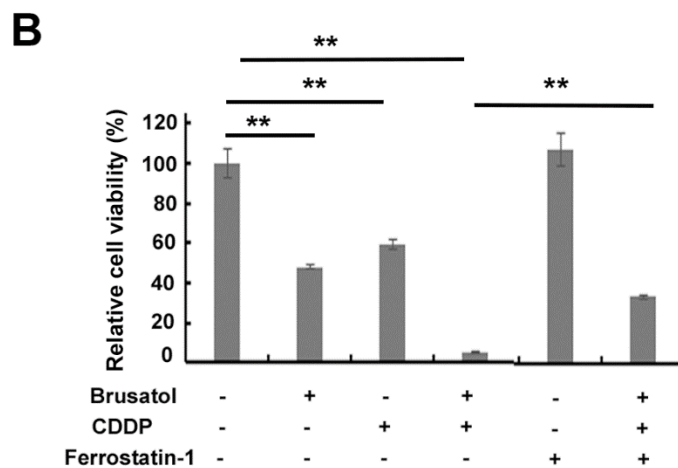

**Supplementary Figure S7. Ferrostatin 1 protected cells from cell death.** FLO1 cells were added with Brusatol or CDDP alone or combination or Ferrostatin 1 (500 nM) together with Brusatol and CDDP for 72h. **A**, Bright images under an inverted microscope. **B**, Summary of ATPglo assay shows relative cell viability after 3 days above treatments. \*\*,  $p < 0.01$ .



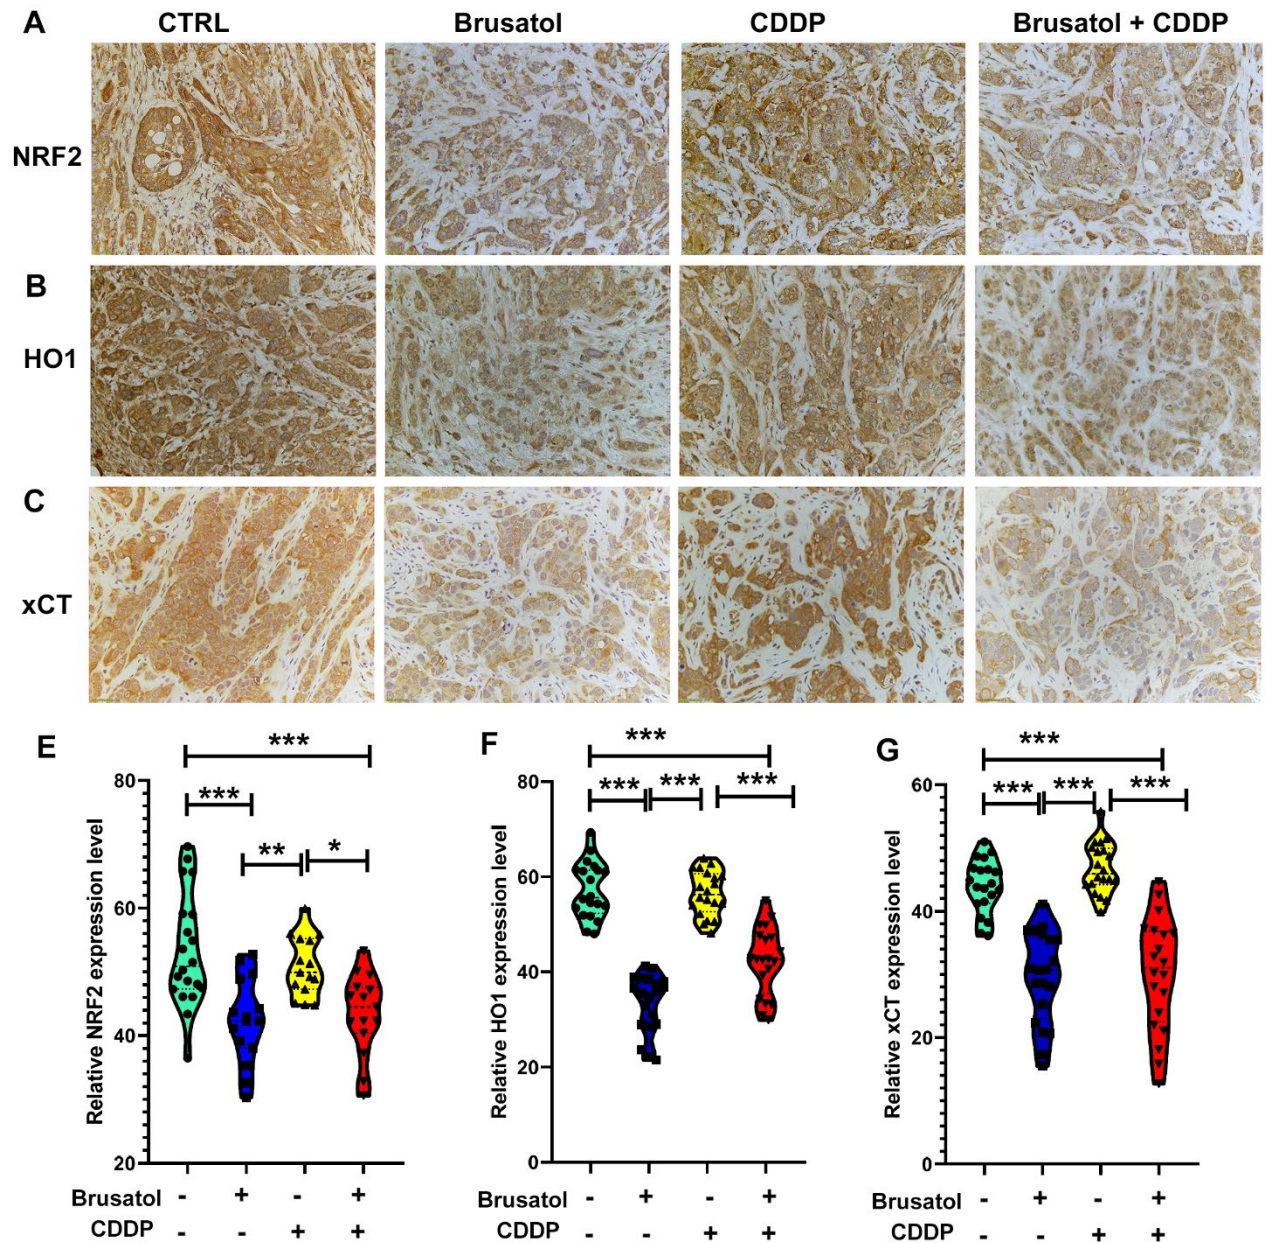

**Supplementary Figure S8. IHC staining of NRF2, HO1, xCT in xenografting tumor tissues.** **A**, representative images of NRF2, **B**, representative images of HO1, **C**, representative images of xCT. **E-G**, quantification of IHC staining intensity using ImageJ software and statistical analysis was performed using Prism software, **E** for NRF2, **F** for HO1 and **G** for xCT. \*,  $p < 0.05$ ; \*\*,  $p < 0.01$ ; \*\*\*,  $p < 0.001$ .

**Supplementary Table S1: Primers for real time PCR**

| <b>Gene name</b> | <b>Forward primer sequence</b> | <b>Reverse primer sequence</b> |
|------------------|--------------------------------|--------------------------------|
| NFE2L2           | ACACGGTCCACAGCTCATC            | TCTTGCCTCCAAAGTATGTCAA         |
| HO1              | AACTTTCAGAAGGGCCAGGT           | CTTGTTGCGCTCAATCTCCT           |
| GR               | GTGGTGGAGAGCCACAAGC            | ACCCTCACAACTTGGAAAGC           |
| NQO1             | CAGCTCACCGAGAGCCTAGT           | CAGCCTCCTTCATGGCATAG           |
| GSTM1            | AGGACTTCATCTCCCGCTTT           | AGGCTGAGTATGGGCTCCTC           |
| GSTM2            | CCTTCCCAAACCTGAAGGA            | TTCAAGGCCCTACTTGTTGC           |
| GSTM3            | GCTCCTGGAGTTCACGGATA           | GCATTGCTCTGGGTGATCTT           |
| GSTO1            | GGACGCGTCTAGTCCTGAAG           | CAGGTGATGGCAGACTCGTAG          |
| GPX3             | GCC GGG GAC AAG AGA AGT        | GAG GAC GTA TTT GCC AGC AT     |
| GPX4             | GCCTTTGCCGCCTACTGA             | TAACCATGTGCCCCTCGAT            |
